# Supplementary material for: Host RNA Expression Signatures in Young Infants with Urinary Tract Infection: A Prospective Study
Source: MDPI journal article supplement (doi:10.3390/ijms25094857), 2024-04-29
Supplement: s1 [file s1]

## Supplemental Material

**Table S1.** Pathogens in the young infants with UTI with bacteremia, UTI without bacteremia, and definite viral infection.

| UTI with bacteremia<br>(n=7)      | UTI without bacteremia<br>(n=46)  | Definite viral infection<br>(n=33) |
|-----------------------------------|-----------------------------------|------------------------------------|
| <i>Escherichia coli</i> (n=6)     | <i>Escherichia coli</i> (n=41)    | Rhinovirus (n=12)                  |
| <i>Enterobacter species</i> (n=1) | <i>Enterococcus species</i> (n=4) | Respiratory syncytial virus (n=9)  |
|                                   | <i>Enterobacter species</i> (n=1) | Parainfluenzavirus (n=3)           |
|                                   |                                   | Enterovirus (n=2)                  |
|                                   |                                   | Sars-CoV-2 (n=2)                   |
|                                   |                                   | Coronavirus OC43 (n=1)             |
|                                   |                                   | Influenza A virus (n=1)            |
|                                   |                                   | Rotavirus (n=1)                    |
|                                   |                                   | Varicella zoster virus (n=1)       |

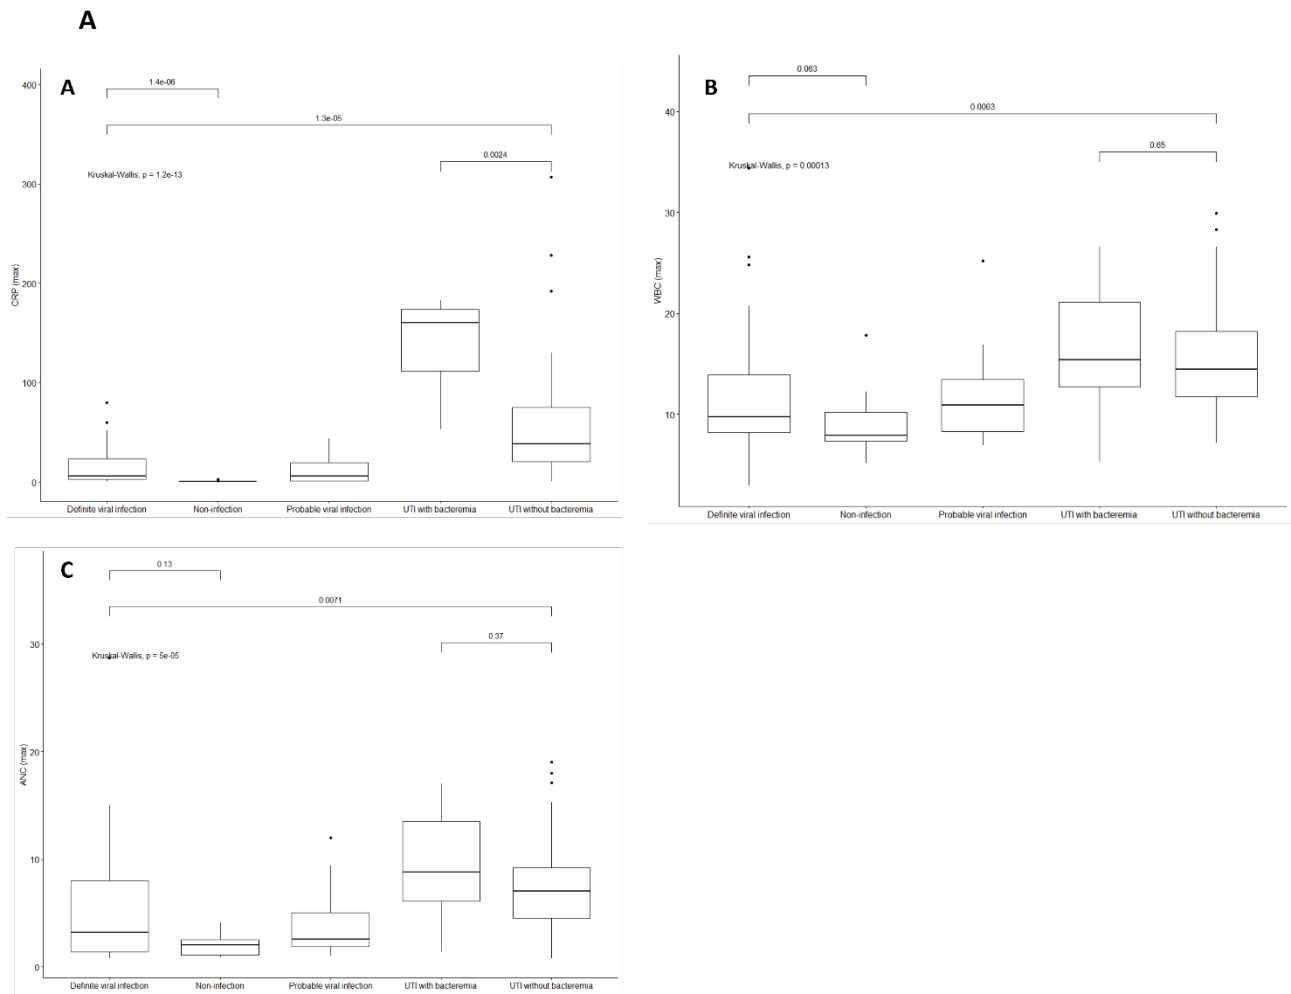

**Figure S1.** Pairwise comparisons of **A)** C-reactive protein (max), **B)** white blood cell count (max) and **C)** absolute neutrophilic count (max) among groups of young infants with UTI with bacteremia, UTI without bacteremia, definite and probable viral infection and non-infection. Statistics: Kruskal Wallis test and Dunn's post-hoc analysis.

| <b>Table S2.</b> The top upregulated genes in young infants with UTI without bacteremia compared to definite viral infection. |               |              |                                                                                                                                                                                |
|-------------------------------------------------------------------------------------------------------------------------------|---------------|--------------|--------------------------------------------------------------------------------------------------------------------------------------------------------------------------------|
| <b>Symbol</b>                                                                                                                 | <b>Log2FC</b> | <b>P-adj</b> | <b>Function</b> (source: <a href="http://www.genecards.com">www.genecards.com</a> )                                                                                            |
| RP11-429G19.3                                                                                                                 | 1.12          | <0.0001      | No annotation.                                                                                                                                                                 |
| RP11-356C4.6                                                                                                                  | 1.88          | <0.0001      | No annotation.                                                                                                                                                                 |
| IL10RB-AS1                                                                                                                    | 0.66          | <0.0001      | RNA gene affiliated with the lncRNA class.                                                                                                                                     |
| CLRN1                                                                                                                         | 1.99          | <0.0001      | Development and homeostasis inner ear and retina.                                                                                                                              |
| FAM20A                                                                                                                        | 1.03          | <0.0001      | Likely secreted and may function in hematopoiesis.                                                                                                                             |
| AC013461.1                                                                                                                    | 0.89          | <0.0001      | No annotation.                                                                                                                                                                 |
| TRPS1                                                                                                                         | 0.62          | <0.0001      | Transcription factor that represses GATA-regulated genes.                                                                                                                      |
| CD44                                                                                                                          | 0.60          | <0.0001      | Cell-cell interactions, cell adhesion and migration. Activation, recirculation, and homing of T-lymphocytes. Hematopoiesis, inflammation, and response to bacterial infection. |
| LTA4H                                                                                                                         | 0.90          | <0.0001      | Synthesis of leukotriene B4, a proinflammatory mediator. Degrading proline-glycine-proline (PGP), a neutrophil chemoattractant.                                                |
| ANKRD50                                                                                                                       | 0.61          | <0.0001      | Endocytic recycling.                                                                                                                                                           |
| SETD7                                                                                                                         | 0.51          | <0.0001      | Histone-lysine N-methyltransferase activity and p53 binding activity. In response to DNA damage stimulus and heterochromatin organization.                                     |
| KIAA1324                                                                                                                      | 1.64          | <0.0001      | Apoptosis and cell proliferation.                                                                                                                                              |
| TMCO3                                                                                                                         | 0.66          | <0.0001      | Export of monovalent cations and import of protons across cellular membranes.                                                                                                  |
| RP11-67L2.2                                                                                                                   | 0.59          | <0.0001      | No annotation.                                                                                                                                                                 |
| HSPBAP1                                                                                                                       | 0.45          | <0.0001      | Binds to one of the small heat shock proteins, specifically hsp27.                                                                                                             |
| SUMF1                                                                                                                         | 0.38          | <0.0001      | Enzyme that catalyzes the hydrolysis of sulfate esters.                                                                                                                        |

Gene annotations were obtained from [www.genecards.com](http://www.genecards.com).

**Table S3.** The top differentially expressed genes (n=50) in young infants with UTI without bacteremia compared to definite viral infections.

| no | symbol     | alias                                                               | log2FC | p-adj    | function (source: <a href="http://www.genecards.com">www.genecards.com</a> )                                                                              |
|----|------------|---------------------------------------------------------------------|--------|----------|-----------------------------------------------------------------------------------------------------------------------------------------------------------|
| 1  | AXL        | AXL Receptor Tyrosine Kinase                                        | -1.95  | 2.05e-11 | Receptor tyrosine kinase, cell survival, cell proliferation, migration and differentiation. Toll-like receptors (TLRs)-mediated innate immune response..  |
| 2  | KIAA1324   | Endosome-Lysosome Associated Apoptosis And Autophagy Regulator 1    | 1.64   | 2.25e-11 | Apoptosis and cell proliferation.                                                                                                                         |
| 3  | HIST1H2BO  | H2B Clustered Histone 17                                            | -1.19  | 9.53e-10 | Histone activity.                                                                                                                                         |
| 4  | CCL2       | C-C Motif Chemokine Ligand 2                                        | -3.84  | 1.22e-09 | Cytokine, chemotactic activity for monocytes and basophils.                                                                                               |
| 5  | TMEM255A   | Transmembrane Protein 255A                                          | -1.29  | 1.22e-09 | Upstream of or within response to bacterium.                                                                                                              |
| 6  | CYP2J2     | Cytochrome P450 Family 2 Subfamily J Member 2                       | -1.30  | 1.73e-09 | Monooxygenase. Drug metabolism, synthesis of cholesterol, steroids and other lipids.                                                                      |
| 7  | HIST1H2BJ  | H2B Clustered Histone 11                                            | -0.89  | 1.73e-09 | Histone activity.                                                                                                                                         |
| 8  | GPR15      | G Protein-Coupled Receptor 15                                       | -0.97  | 1.73e-09 | Protein Coding. Probable chemokine receptor. Alternative coreceptor with CD4 for HIV-1 infection.                                                         |
| 9  | FAM20A     | FAM20A Golgi Associated Secretory Pathway Pseudokinase              | 1.03   | 1.73e-09 | Likely secreted and may function in hematopoiesis.                                                                                                        |
| 10 | HERC6      | HECT AND RLD Domain Containing E3 Ubiquitin Protein Ligand Member 6 | -1.67  | 2.69e-09 | Related Class I MHC mediated antigen processing and presentation and Innate Immune System.                                                                |
| 11 | NRIR       | Negative Regulator Of Interferon Response                           | -1.79  | 4.73e-09 | A functional long non-coding RNA. May be a negative regulator of interferon response.                                                                     |
| 12 | LY6E       | Lymphocyte Antigen 6 Family Member E                                | -1.69  | 5.45e-09 | Regulates T-lymphocytes proliferation, differentiation, and activation.                                                                                   |
| 13 | SSTR3      | Somatostatin Receptor 3                                             | -0.92  | 5.45e-09 | Neurotransmission, cell proliferation, and endocrine signaling, inhibiting the release of hormones and other secretory proteins.                          |
| 14 | LAX1       | Lymphocyte Transmembrane Adaptor 1                                  | -0.57  | 5.45e-09 | B cell activation; negative regulation of MAP kinase activity; and negative regulation of T cell activation.                                              |
| 15 | HIST1H2BH  | H2B Clustered Histone 9                                             | -0.96  | 6.79e-09 | Histone activity.                                                                                                                                         |
| 16 | USP18      | Ubiquitin Specific Peptidase 18                                     | -2.46  | 6.79e-09 | Interferon-induced ISG15-specific protease. Regulates T-cell activation, negative regulation of the inflammatory response triggered by type I interferon. |
| 17 | AC013461.1 |                                                                     | 0.89   | 6.81e-09 | No annotation.                                                                                                                                            |
| 18 | HIST1H2BI  | H2B Clustered Histone 10                                            | -1.03  | 2.1e-08  | Histone activity.                                                                                                                                         |
| 19 | HIST1H2BE  | H2B Clustered Histone 6                                             | -0.96  | 2.1e-08  | Histone activity.                                                                                                                                         |
| 20 | HIST1H3C   | H3 Clustered Histone 3                                              | -1.16  | 2.3e-08  | Histone activity.                                                                                                                                         |
| 21 | PNPT1      | Polyribonucleotide Nucleotidyltransferase 1                         | -1.09  | 2.83e-08 | RNA-metabolic processes.                                                                                                                                  |
| 22 | ISG15      | ISG15 Ubiquitin Like Modifier                                       | -2.37  | 2.89e-08 | Chemotactic activity towards neutrophils, cell-to-cell signaling, and antiviral activity.                                                                 |

|    |               |                                                          |       |          |                                                                                                                                                       |
|----|---------------|----------------------------------------------------------|-------|----------|-------------------------------------------------------------------------------------------------------------------------------------------------------|
| 23 | HIST1H2AL     | H2A Clustered Histone 16                                 | -1.08 | 2.89e-08 | Histone activity.                                                                                                                                     |
| 24 | GALM          | Galactose Mutarotase                                     | -0.86 | 3.19e-08 | Galactose metabolism.                                                                                                                                 |
| 25 | HIST1H2BF     | H2B Clustered Histone 7                                  | -0.70 | 3.74e-08 | Histone activity.                                                                                                                                     |
| 26 | RP11-356C4.6  |                                                          | 1.88  | 8.09e-08 | No annotation.                                                                                                                                        |
| 27 | SLAMF6        | SLAM Family Member 6                                     | -0.46 | 8.5e-08  | Immunoglobulin superfamily expressed on Natural killer (NK), T, and B lymphocytes. NK cell activation.                                                |
| 28 | MX1           | MX Dynamin Like GTPase 1                                 | -1.94 | 1.06e-07 | Cellular antiviral response. Induced by type I and type II interferons. Antagonizes the replication process of several different RNA and DNA viruses. |
| 29 | LINC00487     | Long intergenic non-protein coding RNA 487               | -2,19 | 1.06e-07 | RNA gene, affiliated with the lncRNA class.                                                                                                           |
| 30 | JADE2         | Jade Family PHD Finger 2                                 | -0.43 | 1.08e-07 | Histone activity.                                                                                                                                     |
| 31 | OAS2          | 2'-5'-Oligoadenylate Synthetase 2                        | -1.50 | 1.11e-07 | Innate immune response to viral infection.                                                                                                            |
| 32 | HSPBAP1       | HSPB1 Associated Protein 1                               | 0.45  | 1.11e-07 | Binds to one of the small heat shock proteins, specifically hsp27.                                                                                    |
| 33 | IGLV3-21      | Immunoglobulin Lambda Variable 3-21                      | -1.48 | 1.11e-07 | Variable domain of immunoglobulin light chains, antigen recognition.                                                                                  |
| 34 | LAMP3         | Lysosomal Associated Membrane Protein 3                  | -2.56 | 1.11e-07 | Protein degradation and cell survival. Autophagic process. May also play a role in dendritic cell function and in adaptive immunity.                  |
| 35 | SUMF1         | Sulfatase Modifying Factor 1                             | 0.38  | 1.13e-07 | Enzyme that catalyzes the hydrolysis of sulfate esters.                                                                                               |
| 36 | PGAP1         | Post-GPI Attachment to Proteins Inositol Deacylase 1     | -1.24 | 1.21e-07 | Transport of GPI-anchored proteins from the endoplasmic reticulum to the Golgi.                                                                       |
| 37 | ZNF620        | Zinc Finger Protein 620                                  | -0.52 | 1.21e-07 | Negative regulation of transcription by RNA polymerase II.                                                                                            |
| 38 | PPM1K         | Protein Phosphatase Mg2+/Mn2+ Dependent 1K               | -0.72 | 1.21e-07 | Cell survival and development. Targeted to the mitochondria,                                                                                          |
| 39 | HIST1H3J      | H3 Clustered Histone 12                                  | -1.16 | 1.22e-07 | Histone activity.                                                                                                                                     |
| 40 | SOBP          | Sine Oculis Binding Protein Homolog                      | -1.53 | 1.52e-07 | Development of the cochlea. Defects in this gene have been linked to intellectual disability.                                                         |
| 41 | IGHG3         | Immunoglobulin Heavy Constant Gamma 3                    | -1.95 | 1.52e-07 | Constant region of immunoglobulin heavy chains.                                                                                                       |
| 42 | LTA4H         | Leukotriene A4 Hydrolase                                 | 0.89  | 1.71e-07 | Synthesis of leukotriene B4, a proinflammatory mediator. Degrading proline-glycine-proline (PGP), a neutrophil chemoattractant.                       |
| 43 | C19orf66      | Shiftless Antiviral Inhibitor of Ribosomal Frameshifting | -0.80 | 1.79e-07 | Interferon stimulated gene (ISG) that inhibits viral replication.                                                                                     |
| 44 | RP11-439M11.1 |                                                          | -1.60 | 1.85e-07 | No annotation.                                                                                                                                        |
| 45 | KIFC1         | Kinesin Family Member C1                                 | -0.95 | 1.85e-07 | Microtubule binding activity.                                                                                                                         |
| 46 | SPATS2L       | Spermatogenesis Associated Serine Rich 2 Like            | -1.83 | 1.86e-07 | Enables RNA binding activity.                                                                                                                         |
| 47 | TRPS1         | Transcriptional Repressor GATA Binding 1                 | 0.61  | 1.86e-07 | Transcription factor that represses GATA-regulated genes.                                                                                             |

|    |           |                                        |       |          |                      |
|----|-----------|----------------------------------------|-------|----------|----------------------|
| 48 | HIST1H3G  | H3 Clustered Histone 8                 | -1.19 | 1.92e-07 | Histone activity.    |
| 49 | ANKRD50   | Ankyrin Repeat Domain<br>Containing 50 | 0.61  | 1.93e-07 | Endocytic recycling. |
| 50 | HIST1H2BM | H2B Clustered histone 14               | -1.01 | 1.99e-07 | Histone activity.    |

Gene annotations were obtained from [www.genecards.com](http://www.genecards.com).
